# Supplementary material
Source: Springer Nature journal article supplement (https://www.springermedizin.de/resource/supplementary/13046_2009_248_MOESM8_ESM.pdf/9661820)

### Day 3 after BMT

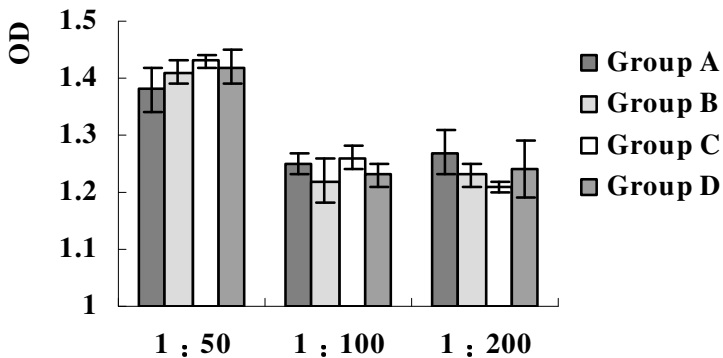

### Day 7 after BMT

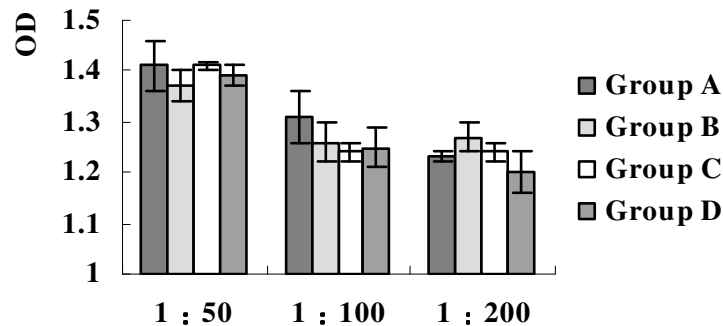

### Day 14 after BMT

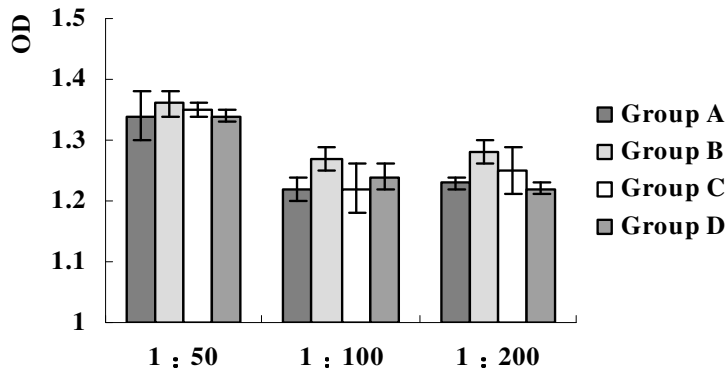

Supplement: MOESM8 [file 9661820]
